# Supplementary material for: Exploring Perceptions and Needs of Mobile Health Interventions for Nutrition, Anemia, and Preeclampsia among Pregnant Women in Underprivileged Indian Communities: A Cross-Sectional Survey
Source: MDPI journal article supplement (doi:10.3390/nu15173699), 2023-08-24
Supplement: s1 [file s1]

Table S1. Indirect paths

| Indirect effects of study variables                                                                           | Original Est. | Bootstrap Mean | Bootstrap SD | T Stat. | CI [5%, 95%]    |
|---------------------------------------------------------------------------------------------------------------|---------------|----------------|--------------|---------|-----------------|
| Perceived susceptibility → Perceived usefulness → Behavioral intention to use → Health seeking behavior       | 0.022         | 0.021          | 0.017        | 1.268   | [-0.002, 0.064] |
| Perceived susceptibility → Perceived usefulness → Behavioral intention to use → Diet and lifestyle changes    | 0.017         | 0.016          | 0.014        | 1.204   | [-0.002, 0.050] |
| Perceived susceptibility → Informed decision making, Behavioral intention to use → Diet and lifestyle changes | 0.003         | 0.004          | 0.007        | 0.380   | [-0.006, 0.022] |
| Perceived susceptibility → Informed decision making, Behavioral intention to use → Health seeking behavior    | 0.004         | 0.005          | 0.009        | 0.384   | [-0.008, 0.030] |
| Perceived susceptibility → Selfcare ability, Behavioral intention to use → Diet and lifestyle changes         | 0.002         | 0.003          | 0.009        | 0.202   | [-0.013, 0.024] |
| Perceived susceptibility → (Selfcare ability, Behavioral intention to use) → Health seeking behavior          | 0.002         | 0.003          | 0.012        | 0.209   | [-0.018, 0.030] |
| Perceived severity → Perceived usefulness → Behavioral intention to use                                       | 0.138         | 0.136          | 0.067        | 2.049   | [0.018, 0.274]  |
| Perceived severity → Informed decision making → Behavioral intention to use                                   | 0.014         | 0.017          | 0.024        | 0.591   | [-0.016, 0.077] |
| Perceived severity → Selfcare ability → Behavioral intention to use                                           | -0.033        | -0.032         | 0.022        | -1.554  | [-0.080, 0.003] |
| Perceived severity → (Perceived usefulness, Behavioral intention to use) → Diet and lifestyle changes         | 0.055         | 0.053          | 0.029        | 1.924   | [0.006, 0.117]  |
| Perceived severity → (Perceived usefulness, Behavioral intention to use) → Health seeking behavior            | 0.074         | 0.071          | 0.035        | 2.101   | [0.009, 0.144]  |
| Perceived severity → Informed decision making → Behavioral intention to use → Diet and lifestyle changes      | 0.006         | 0.007          | 0.010        | 0.563   | [-0.006, 0.033] |
| Perceived severity → Informed decision making → Behavioral intention to use → Diet and lifestyle changes      | 0.008         | 0.009          | 0.013        | 0.571   | [-0.008, 0.043] |
| Perceived severity → Selfcare ability → Behavioral intention to use → Health seeking behavior                 | -0.013        | -0.013         | 0.009        | -1.412  | [-0.036, 0.001] |
| Perceived severity → Selfcare ability → Behavioral intention to use → Diet and lifestyle changes              | -0.018        | -0.017         | 0.012        | -1.464  | [-0.045, 0.002] |
| Perceived ease of use → Perceived usefulness → Behavioral intention to use                                    | 0.067         | 0.063          | 0.035        | 1.896   | [0.005, 0.141]  |
| Perceived ease of use → Behavioral intention to use → Diet and lifestyle changes                              | 0.065         | 0.067          | 0.046        | 1.416   | [-0.013, 0.166] |
| Perceived ease of use → Behavioral intention to use → Health seeking behavior                                 | 0.087         | 0.089          | 0.058        | 1.492   | [-0.019, 0.207] |
| Perceived ease of use → Perceived usefulness → Behavioral intention to use → Diet and lifestyle changes       | 0.027         | 0.025          | 0.016        | 1.636   | [0.002, 0.064]  |
| Perceived ease of use → Perceived usefulness → Behavioral intention to use → Health seeking behavior          | 0.036         | 0.033          | 0.020        | 1.810   | [0.003, 0.078]  |
| Perceived ease of use → Selfcare ability → Behavioral intention to use                                        | 0.076         | 0.077          | 0.040        | 1.906   | [0.009, 0.165]  |
| Perceived ease of use → Selfcare ability → Behavioral intention to use → Diet and lifestyle changes           | 0.030         | 0.031          | 0.019        | 1.615   | [0.003, 0.075]  |
| Perceived ease of use → Selfcare ability → Behavioral intention to use → Health seeking behavior              | 0.041         | 0.041          | 0.024        | 1.724   | [0.004, 0.095]  |
| Self-efficacy → Perceived usefulness → Behavioral intention to use                                            | 0.047         | 0.043          | 0.030        | 1.567   | [-0.007, 0.110] |
| Self-efficacy → Behavioral intention to use → Diet and lifestyle changes                                      | 0.027         | 0.033          | 0.042        | 0.654   | [-0.036, 0.126] |

|                                                                                                     |       |       |       |       |                 |
|-----------------------------------------------------------------------------------------------------|-------|-------|-------|-------|-----------------|
| Self-efficacy → Behavioral intention to use → Health seeking behavior                               | 0.036 | 0.043 | 0.054 | 0.677 | [-0.050, 0.159] |
| Self-efficacy → Perceived usefulness → Behavioral intention to use → Diet and lifestyle changes     | 0.019 | 0.017 | 0.013 | 1.379 | [-0.002, 0.050] |
| Self-efficacy → Perceived usefulness → Behavioral intention to use → Health seeking behavior        | 0.025 | 0.023 | 0.017 | 1.459 | [-0.003, 0.064] |
| Self-efficacy → Informed decision making → Behavioral intention to use                              | 0.030 | 0.026 | 0.038 | 0.793 | [-0.049, 0.108] |
| Self-efficacy → Informed decision making → Behavioral intention to use → Diet and lifestyle changes | 0.012 | 0.010 | 0.015 | 0.810 | [-0.018, 0.043] |
| Self-efficacy → Informed decision making → Behavioral intention to use → Health seeking behavior    | 0.016 | 0.014 | 0.020 | 0.806 | [-0.024, 0.058] |
| Self-efficacy → Selfcare ability → Behavioral intention to use                                      | 0.021 | 0.021 | 0.022 | 0.970 | [-0.015, 0.071] |
| Self-efficacy → Selfcare ability → Behavioral intention to use → Diet and lifestyle changes         | 0.008 | 0.008 | 0.009 | 0.904 | [-0.006, 0.031] |
| Self-efficacy → Selfcare ability → Behavioral intention to use → Health seeking behavior            | 0.011 | 0.011 | 0.012 | 0.929 | [-0.008, 0.040] |
| Self-efficacy → Behavioral intention to use → Diet and lifestyle changes                            | 0.027 | 0.033 | 0.042 | 0.654 | [-0.036, 0.126] |
| Self-efficacy → Behavioral intention to use → Health seeking behavior                               | 0.036 | 0.043 | 0.054 | 0.677 | [-0.050, 0.159] |
| Perceived usefulness → Behavioral intention to use → Diet and lifestyle changes                     | 0.133 | 0.126 | 0.061 | 2.185 | [0.019, 0.254]  |
| Perceived usefulness → Behavioral intention to use → Health seeking behavior                        | 0.177 | 0.168 | 0.072 | 2.458 | [0.028, 0.309]  |
| Informed decision making → Behavioral intention to use → Diet and lifestyle changes                 | 0.038 | 0.036 | 0.046 | 0.824 | [-0.050, 0.128] |
| Informed decision making → Behavioral intention to use → Health seeking behavior                    | 0.050 | 0.048 | 0.060 | 0.832 | [-0.066, 0.167] |
| Selfcare ability → Behavioral intention to use → Diet and lifestyle changes                         | 0.077 | 0.079 | 0.041 | 1.870 | [0.009, 0.167]  |
| Selfcare ability → Behavioral intention to use → Health seeking behavior                            | 0.103 | 0.105 | 0.051 | 2.016 | [0.013, 0.210]  |
